# Supplementary material for: SARS-CoV-2 mRNA Dual Immunization Induces Innate Transcriptional Signatures, Establishes T-Cell Memory and Coordinates the Recall Response
Source: MDPI journal article supplement (doi:10.3390/vaccines11010103), 2023-01-01
Supplement: s1 [file s1]

## SUPPLEMENTARY MATERIALS

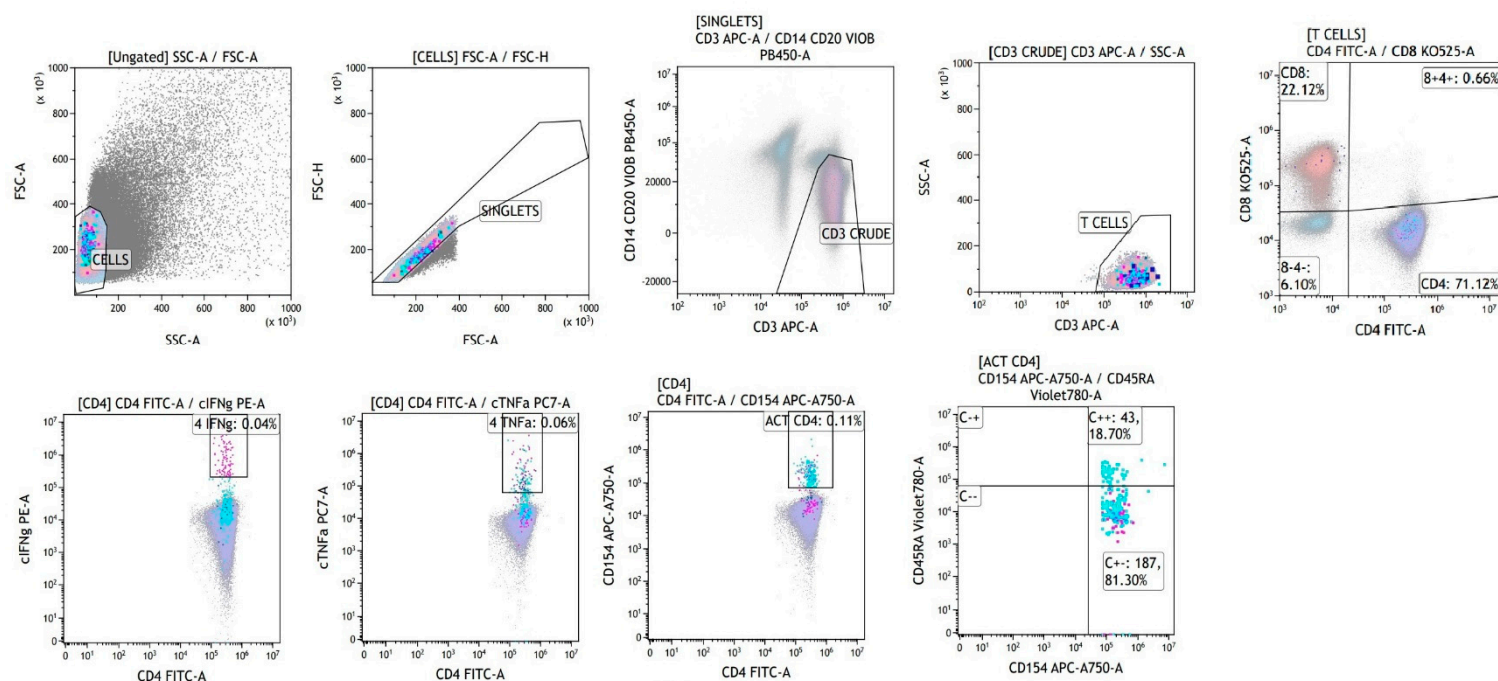

### Supplementary Figure S1. Gating strategy of spike-specific CD4<sup>+</sup> T cells

Flow cytometric characterization of SARS-CoV-2 spike-specific CD4 cells in peripheral blood mononuclear cells (PBMCs) isolated from SARS-CoV-2 naïve healthcare professionals immediately before and 21 days after the second dose of the mRNA BNT162b2 vaccine.

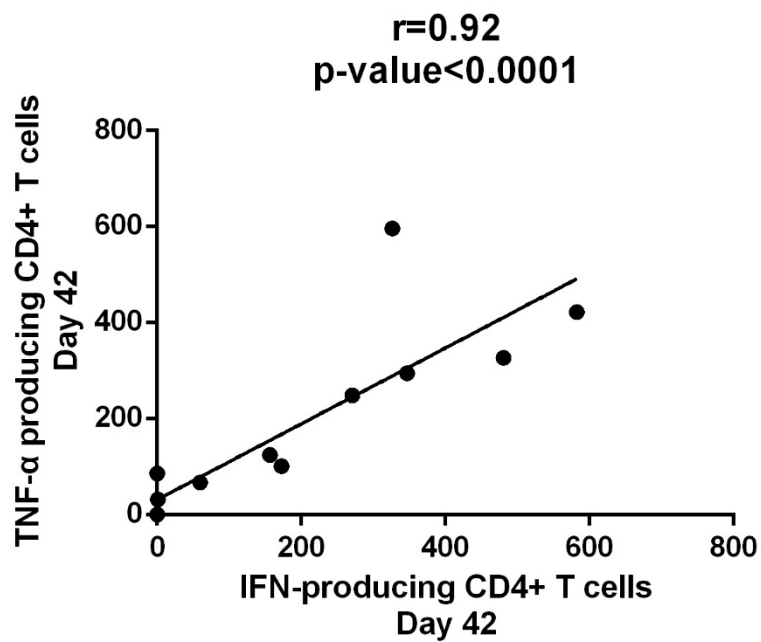

***Supplementary Figure S2. Coordinated induction of IFN- and TNF- $\alpha$  producing CD4+ T cells after completion of the primary series.***

IFN-producing CD4 T cells on Day 42 were correlated with TNF- $\alpha$  producing CD4 T cells at the same time-point. Correlation was estimated with Pearson  $r$  correlation coefficient and significance was calculated by a two tailed  $p$  value. Each dot represents a serum sample.

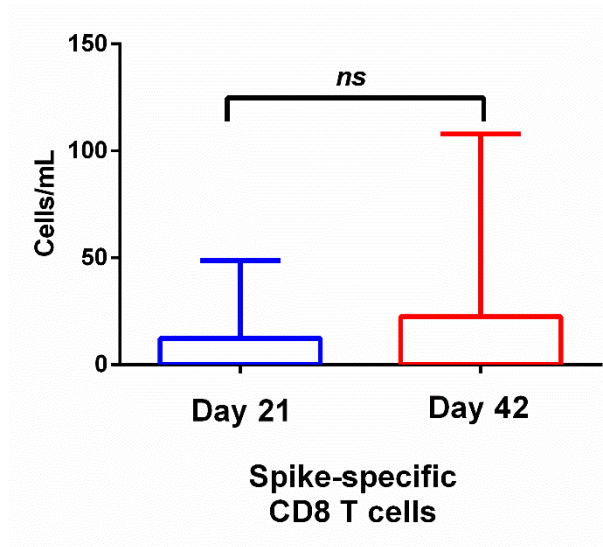

***Supplementary Figure S3. Spike-specific CD8 T cell response following dual BNT162b2 immunization***

Spike-specific CD8 T cells before (D21) and 21 days (D42) after the second BNT162b2 dose in SARS-CoV-2 naïve individuals.

Data are represented as minimum to maximum values.

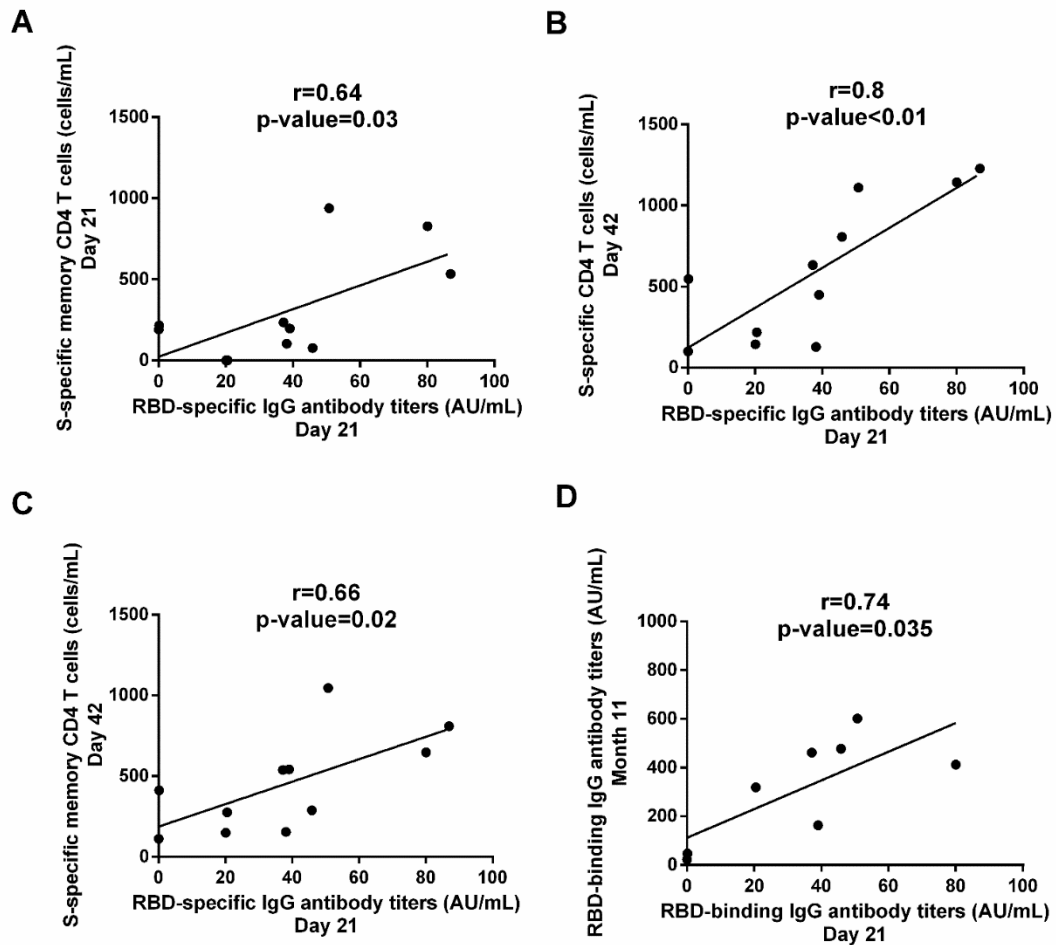

**Supplementary Figure S4. RBD-specific IgG antibody titers achieved after the first dose of the mRNA BNT162b2 vaccine may serve as a predictive marker of immune response to subsequent vaccine doses.**

Correlations of RBD-specific IgG antibody titers after the first dose of the vaccine (Day 21) with A) S-specific memory CD4 T cells on Day 21, B) S-specific CD4 T cells after the second dose (Day 42), C) S-specific memory CD4 T cells on Day 42 and D) RBD-specific IgG antibody titers after the third dose (Month 11). Correlations were estimated with Pearson  $r$  correlation coefficient and significance was calculated by a two tailed  $p$  value. Each dot represents a serum sample.

| Antibodies                                                 | Supplier  |
|------------------------------------------------------------|-----------|
| APC anti-human CD3 REAfinity™ (clone REA613)               | Miltenyi  |
| Vio®Bright B515 anti-human CD4 REAfinity™ (clone REA623)   | Miltenyi  |
| VioGreen™ anti-human CD8 REAfinity™ (clone REA734)         | Miltenyi  |
| PE anti-human IFN-γ (clone 45-15)                          | Miltenyi  |
| PE-Vio® -770 anti-human TNF-α (clone cA2)                  | Miltenyi  |
| VioBlue® anti-human CD14 (clone TÜK4)                      | Miltenyi  |
| VioBlue® anti-human CD20 (clone LT20)                      | Miltenyi  |
| APC-Vio® -770 anti-human CD154 (clone 5C8)                 | Miltenyi  |
| Brilliant Violet 650 anti-human CD197 (CCR7, clone G043H7) | BioLegend |
| Brilliant Violet 785 anti-human CD45RA (clone HI100)       | BioLegend |

***Supplementary Table S1. Monoclonal antibody fluorochromes included in the flow cytometry panel***
